# Supplementary material
Source: PubMed Central journal article supplement (PMC5641967)
Supplement: NIHMS910422-supplement-supplemental_information.pdf [file NIHMS910422-supplement-supplemental_information.pdf]

**Neuron, Volume 92**

**Supplemental Information**

***NR1H3* p.Arg415Gln Is Not Associated  
to Multiple Sclerosis Risk**

**The International Multiple Sclerosis Genetics Consortium**

## IMSGC Members

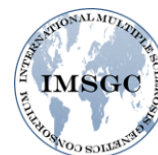

| Name                      | Institution                        |
|---------------------------|------------------------------------|
| Antel, Jack               | McGill University, Canada          |
| Ban, Maria                | Univ. of Cambridge, UK             |
| Baranzini, Sergio         | UCSF                               |
| Barcellos, Lisa           | UC Berkeley                        |
| Barizzone, Nadia          | U. del Piemonte Orientale, Italy   |
| Beecham, Ashley           | Univ. of Miami                     |
| Berge, Tone               | Oslo Univ. Hospital, Norway        |
| Bernardinelli, Luisa      | Univ. of Pavia, Italy              |
| Booth, David              | Univ. of Technology, Sydney        |
| Bos, Steffan              | Oslo Univ. Hospital, Norway        |
| Buck, Dorothea            | Isar Technische Univ., Germany     |
| Butkiewicz, Mariusz       | Case Western                       |
| Celius, Elisabeth G.      | Oslo Univ. Hospital, Norway        |
| Comabella, Manuel         | Vall D'Hebron Res Inst., Barcelona |
| <b>Compston, Alastair</b> | Univ. of Cambridge, UK             |
| Dedham, Katrina           | Univ. of Cambridge, UK             |
| Cotsapas, Chris           | Yale                               |
| D' Alfonso, Sandra        | U. del Piemonte Orientale, Italy   |
| De Jager, Phil            | BWH, Boston                        |
| Dubois, Benedicte         | KU Leuven, Belgium                 |
| Duquette, Pierre          | Univ. de Montreal, Canada          |
| Fontaine, Bertrand        | UPMC, Paris, France                |
| Gasperi, Christiane       | Isar Technische Univ., Germany     |
| Gil, Elia                 | Vall D'Hebron Res Inst., Barcelona |
| Goris, An                 | KU Leuven, Belgium                 |
| Gourraud, Pierre Antoine  | UCSF                               |
| Graetz, Christiane        | University Medicine Mainz, Germany |
| Gyllenberg, Alexandra     | Karolinska Inst., Sweden           |
| Hadjigeorgiou, Georgios   | Univ. of Thessaly, Volos, Greece   |
| <b>Hafler, David</b>      | Yale                               |
| Hribko, Deanna            | Yale                               |
| Haines, Jonathan          | Case Western                       |
| <b>Harbo, Hanne</b>       | Oslo Univ. Hospital, Norway        |
| <b>Hauser, Stephen</b>    | UCSF                               |
| Warto, Shannon            | UCSF                               |
| Hawkins, Clive            | Keele University, UK               |
| Hemmer, Bernhard          | Isar Technische Univ., Germany     |
| Henry, Roland             | UCSF                               |
| Hintzen, Rogier           | Erasmus MS, Netherlands            |
| Horakova, Dana            | Charles Univ. in Prague            |
| <b>Ivinson, Adrian</b>    | BWH, Boston                        |

|                           |                                         |
|---------------------------|-----------------------------------------|
| Howard, Melissa           | BWH, Boston                             |
| Jelcic, Ilijas            | Univ. Hospital, Zurich                  |
| Kaskow, Belinda           | BWH, Boston                             |
| Kira, Jun-Ichi            | Kyushu Univ., Japan                     |
| Kleinova, Pavlina         | Charles Univ. in Prague                 |
| Kockum, Ingrid            | Karolinska Inst., Sweden                |
| Kucerova, Karolina        | Charles Univ. in Prague                 |
| Lill, Christina M.        | Univ. Medicine Mainz & Univ. of Luebeck |
| Luessi, Felix             | University Medicine Mainz, Germany      |
| Malhotra, Sunny           | Vall D'Hebron Res Inst., Barcelona      |
| Martin, Roland            | Univ. Hospital, Zurich                  |
| Martinelli, Filippo       | U. Vita-Salute, San Raffaele, Italy     |
| Matsushita, Takuya        | Kyushu Univ., Japan                     |
| McCabe, Cristin           | Broad Institute, Boston                 |
| McCauley, Jacob           | Univ. of Miami                          |
| Mescheriakkova, Julia     | Erasmus MS, Netherlands                 |
| Mitrovic, Mitja           | Yale                                    |
| Moen, Stine-Marit         | Oslo Univ. Hospital, Norway             |
| Montalban, Xavier         | Vall D'Hebron Res Inst., Barcelona      |
| Muhlau, Mark              | Isar Technische Univ., Germany          |
| Nakamura, Yuri            | Kyushu Univ., Japan                     |
| Oksenberg, Jorge          | UCSF                                    |
| Olsson, Tomas             | Karolinska Inst., Sweden                |
| Oturai, Annette           | Kobenhavns Univ., Denmark               |
| Palotie, Aarno            | Sanger Inst., UK                        |
| Patsopoulos, Nikolaos     | BWH, Boston                             |
| Pavlicova (Vavrova), Jana | Charles Univ. in Prague                 |
| Pericak-Vance, Peggy      | Univ. of Miami                          |
| Piehl, Fredrik            | Karolinska Inst., Sweden                |
| Rebeix, Isabelle          | UPMC, Paris, France                     |
| Rioux, John               | Univ. de Montreal, Canada               |
| Saarela, Janna            | FIMM Tech Centre, Finland               |
| Sawcer, Stephen           | Univ. of Cambridge, UK                  |
| Sellebjerg, Finn          | The Danish Multiple Sclerosis Center    |
| Sondergaard, Helle Bach   | The Danish Multiple Sclerosis Center    |
| Sorensen, Per Soelberg    | The Danish Multiple Sclerosis Center    |
| Sospedra, Mireia          | Univ. Hospital, Zurich                  |
| Spurkland, Anne           | University of Oslo, Norway              |
| <b>Stewart, Graeme</b>    | Univ. of Sydney                         |
| Taylor, Bruce             | Univ. of Tasmania                       |
| Uitterlinden, Andre       | Erasmus MS, Netherlands                 |
| Van Duijn, Cornelia       | Erasmus MS, Netherlands                 |
| Zipp, Frauke              | University Medicine Mainz, Germany      |

IMSGC Governance Group is in **bold**
